# Supplementary material
Source: MDPI journal article supplement (https://www.mdpi.com/2079-6412/12/4/466)
Supplement: s1 [file s1 › coatings-1652894-supplementary.pdf]

Supplementary

# Materials: Peracetic Acid Activated with Electro-Fe<sup>2+</sup> Process for Dye Removal in Water

Deling Yuan <sup>1,2</sup>, Kai Yang <sup>1,2</sup>, Eryu Zhu <sup>1,2</sup>, Xiongbo Li <sup>1,2</sup>, Mengting Sun <sup>1,2</sup>, Lichun Xiao <sup>1,2,\*</sup>, Qiga Hari <sup>4,\*</sup> and Shoufeng Tang <sup>1,2,3,\*</sup>

<sup>1</sup> Hebei Key Laboratory of Heavy Metal Deep-Remediation in Water and Resource Reuse, School of Environmental and Chemical Engineering, Yanshan University, Qinhuangdao 066004, China; yuandl@ysu.edu.cn (D.Y.); yangkaiysu@163.com (K.Y.); zhueryu2022@163.com (E.Z.); lixbysu@163.com (X.L.); collins1204@163.com (M.S.)

<sup>2</sup> Hebei Key Laboratory of Applied Chemistry, School of Environmental and Chemical Engineering, Yanshan University, Qinhuangdao 066004, China

<sup>3</sup> State Key Laboratory of Metastable Materials Science and Technology, School of Materials Science and Engineering, Yanshan University, Qinhuangdao 066004, China

<sup>4</sup> Hebei Province Low-carbon and Clean Building Heating Technology Innovation Center, Hebei Key Laboratory of Green Construction and Intelligent Maintenance for Civil Engineering, School of Civil Engineering and Mechanics, Yanshan University, Qinhuangdao 066006, China

\* Correspondence: xlc@ysu.edu.cn (L.X.); hariqiga@hotmail.com (Q.H.); tangshf@ysu.edu.cn (S.T.)

## Text S1. Materials and Reagents

Methylene blue (MB), rhodamine b (RhB), peracetic acid (PAA), potassium chloride (KCl), sodium bicarbonate (NaHCO<sub>3</sub>), sodium nitrate (NaNO<sub>3</sub>), ferrous sulfate (FeSO<sub>4</sub>), and ethylenediamine tetra acetic acid disodium (EDTA-2Na) were supplied from Kermel Chemical Reagent Co., Ltd. Methyl orange (MO) was supplied from Guangfu Fine Chemical Research Institute. PAA stock solution was prepared through mixing acetic acid and H<sub>2</sub>O<sub>2</sub> and stored at 4 °C. Hydrogen peroxide (H<sub>2</sub>O<sub>2</sub>), glacial acetic acid (CH<sub>3</sub>COOH), potassium iodide (KI), and sodium thiosulfate (Na<sub>2</sub>S<sub>2</sub>O<sub>3</sub>) were supplied from Kaitong Chemical Reagent Co., Ltd. Metronidazole (MTZ), tetracycline (TCH), Humic acid (HA), L-Histidine (L-His), ammonium molybdate ((NH<sub>4</sub>)<sub>2</sub>MoO<sub>4</sub>), potassium permanganate (KMnO<sub>4</sub>), sodium phosphate dibasic dodecahydrate (Na<sub>2</sub>HPO<sub>4</sub>·12H<sub>2</sub>O), hydroxylamine hydrochloride (NH<sub>2</sub>OH·HCl), and sodium dihydrogen phosphate (NaH<sub>2</sub>PO<sub>4</sub>) were supplied from Aladdin company. Tert-butyl alcohol, L-Histidine, phenol and sodium acetate (CH<sub>3</sub>COONa) were supplied from Song Qi Trading Co., Ltd. P-benzoquinone and methanol were supplied from Damao Chemical Reagent Factory. Phenol was purchased from Guangzhou Chemical Reagent Factory. Sodium hydroxide (NaOH), phenanthroline, hydrochloric acid (HCl), sulfuric acid (H<sub>2</sub>SO<sub>4</sub>), and N, N-Diethyl-p-phenylenediamine (DPD) were purchased from Sinopharm Chemical Reagent Co., Ltd. All the chemicals were used as received without further purification. Deionized water was used to prepare aqueous solutions.

## Text S2. Equipment and Procedure

The EC system was supplied by the direct current (DC) power (WYK-60V10A-H, Guangdong East Power Co., Ltd., China). A Pt sheet (20 mm × 20 mm × 0.1 mm) was applied as the anode purchased from Xuzhou Zhenghao Electronic Technology Co., Ltd., China. A graphite plate (20 mm × 100 mm × 3 mm) was used as the cathode obtained from Beijing Crystal Carbon Technology Co., Ltd., China. Two electrodes with an interelectrode distance of 2 cm were inserted into the solution and linked to the DC power.

**Citation:** Yuan, D.; Yang, K.; Zhu, E.; Li, X.; Sun, M.; Xiao, L.; Hari, Q.; Tang, S. Peracetic Acid Activated with Electro-Fe<sup>2+</sup> Process for Dye Removal in Water. *Coatings* **2022**, *12*, 466. <https://doi.org/10.3390/coatings12040466>

Academic Editor: Ioannis Pashalidis

Received: 10 March 2022

Accepted: 28 March 2022

Published: 29 March 2022

**Publisher's Note:** MDPI stays neutral with regard to jurisdictional claims in published maps and institutional affiliations.

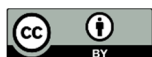

**Copyright:** © 2022 by the authors. Submitted for possible open access publication under the terms and conditions of the Creative Commons Attribution (CC BY) license (<https://creativecommons.org/licenses/by/4.0/>).

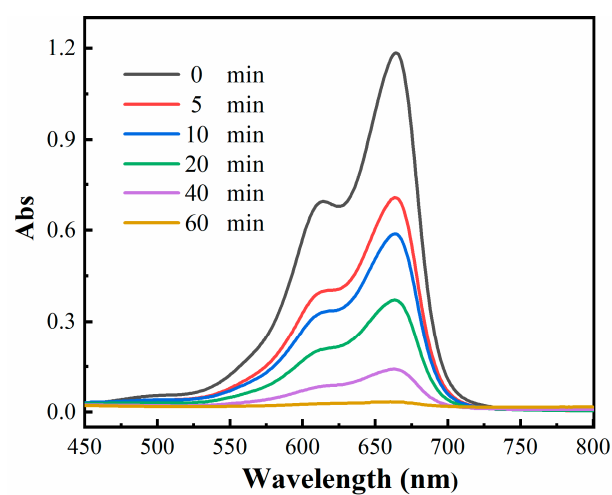

**Figure S1.** UV-Vis spectrum for MB removal in EC/Fe<sup>2+</sup>/PAA system. Experimental conditions: [MB]<sub>0</sub> = 20 mg L<sup>-1</sup>, [Fe<sup>2+</sup>]<sub>0</sub> = 30 μmol L<sup>-1</sup>, [PAA]<sub>0</sub> = 5.4 mmol L<sup>-1</sup>, [H<sub>2</sub>O<sub>2</sub>]<sub>0</sub> = 11.25 mmol L<sup>-1</sup>, [NaNO<sub>3</sub>] = 30 mmol L<sup>-1</sup>, pH = 2.9, *j* = 15 mA cm<sup>-2</sup>.

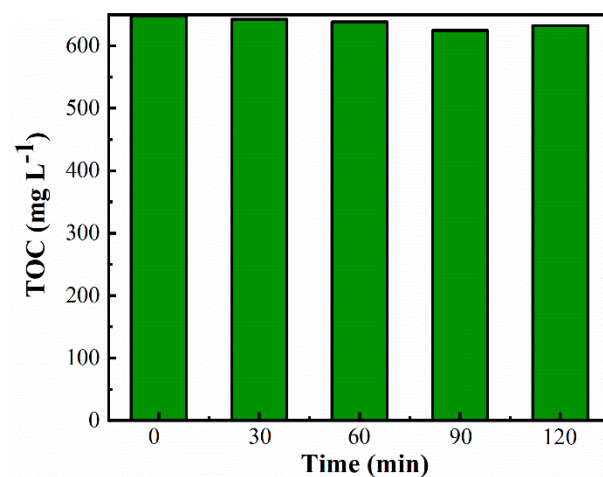

**Figure S2.** TOC removal for MB in EC/Fe<sup>2+</sup>/PAA system. Experimental conditions: [MB]<sub>0</sub> = 20 mg L<sup>-1</sup>, [Fe<sup>2+</sup>]<sub>0</sub> = 30 μmol L<sup>-1</sup>, [PAA]<sub>0</sub> = 5.4 mmol L<sup>-1</sup>, [H<sub>2</sub>O<sub>2</sub>]<sub>0</sub> = 11.25 mmol L<sup>-1</sup>, [NaNO<sub>3</sub>] = 30 mmol L<sup>-1</sup>, pH = 2.9, *j* = 15 mA cm<sup>-2</sup>.

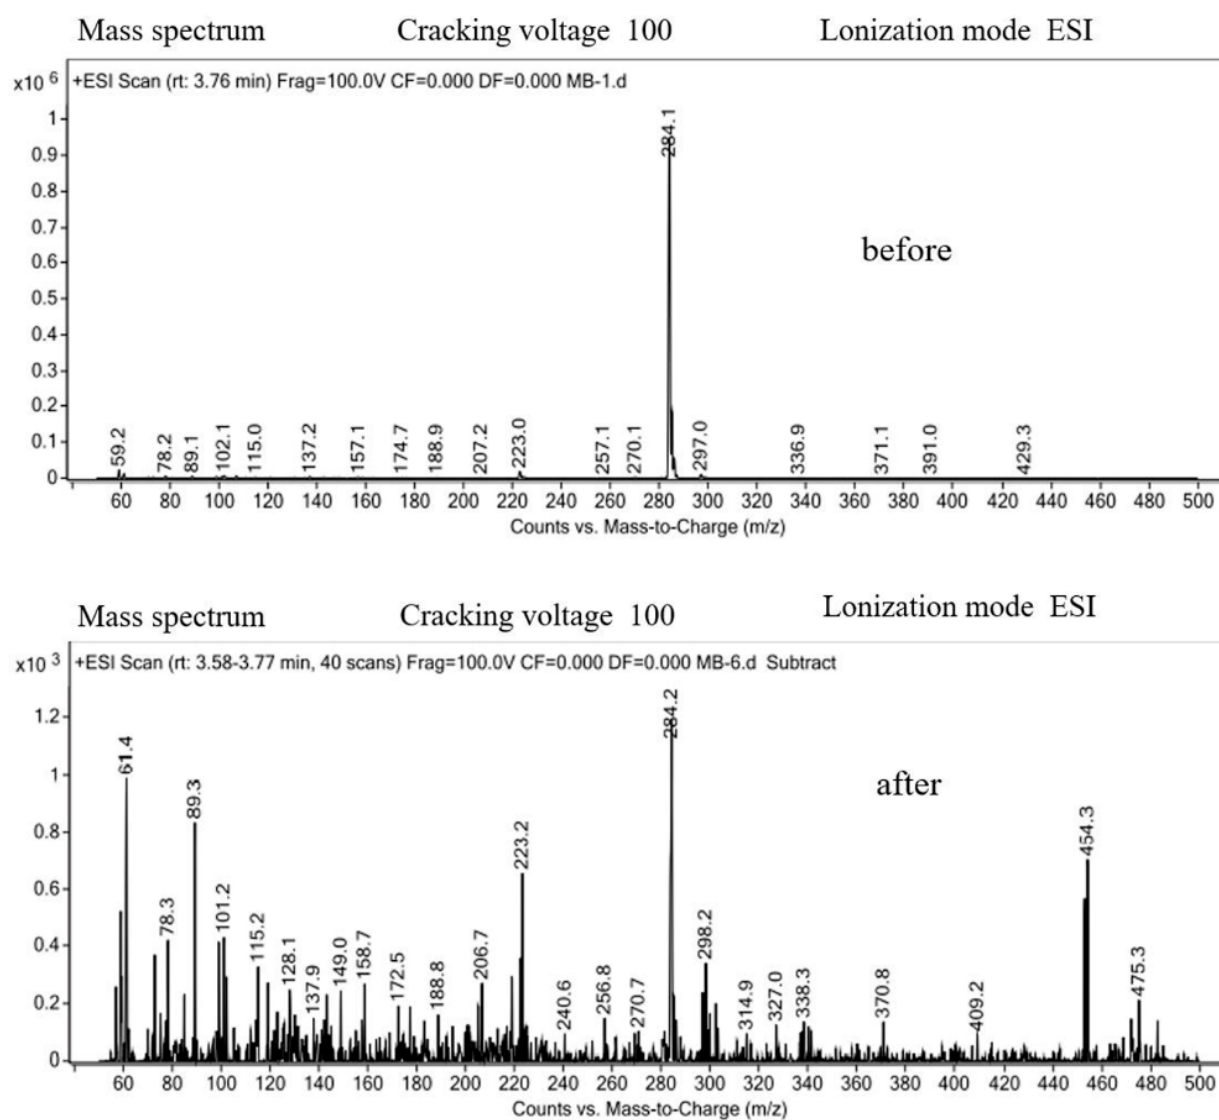

Figure S3. HPLC-MS analysis of MB before and after reaction.
